# Supplementary material for: ανβ3 integrin-targeted ICG-derived probes for imaging-guided surgery and photothermal therapy of oral cancer
Source: Royal Society of Chemistry journal article supplement (doi:10.1039/d3an01761c), 2023-01-01
Supplement: d3an01761c1.pdf [file d3an01761c1.pdf]

## Supporting Information (SI)

### $\alpha\text{v}\beta\text{3}$ Integrin-targeted ICG-derivated theranostic probes for imaging-guided surgery and photothermal therapy of oral cancer

Changhe Men,<sup>†c</sup> Yuqi Zhang,<sup>†b</sup> Peiyang Shi,<sup>d</sup> Zichun Tang<sup>\*a</sup> and Xiaju Cheng<sup>\*b</sup>

<sup>a</sup>Department of Oral and Maxillofacial Surgery, Suzhou Stomatological Hospital, Suzhou 215000, China

<sup>b</sup>State Key Laboratory of Radiation Medicine and Protection, School for Radiological and Interdisciplinary Sciences (RAD-X) and Collaborative Innovation Center of Radiation Medicine of Jiangsu Higher Education Institutions, Suzhou Medical College of Soochow University, Suzhou 215123, China

<sup>c</sup>Suzhou Medical College, Soochow University, Suzhou 215123, China

<sup>d</sup>Suzhou High School of Jiangsu Province, Suzhou 215007, China

<sup>†</sup>Changhe Men and Yuqi Zhang contributed equally to this work.

\*Corresponding author: [tzc9439@126.com](mailto:tzc9439@126.com); [xjcheng@suda.edu.cn](mailto:xjcheng@suda.edu.cn)

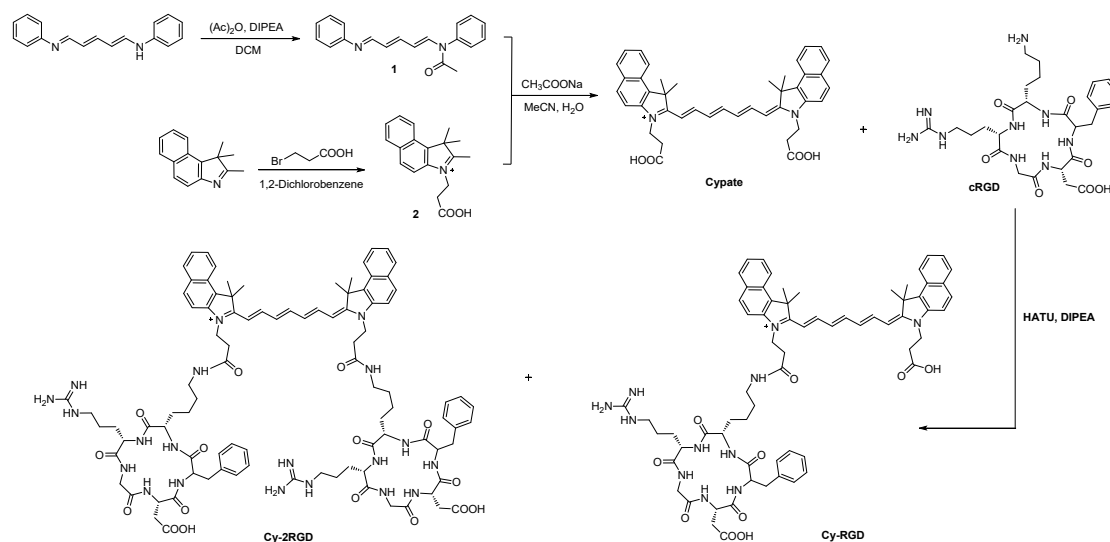

**Scheme S1.** The synthetic route of probes Cy-RGD and Cy-2RGD.

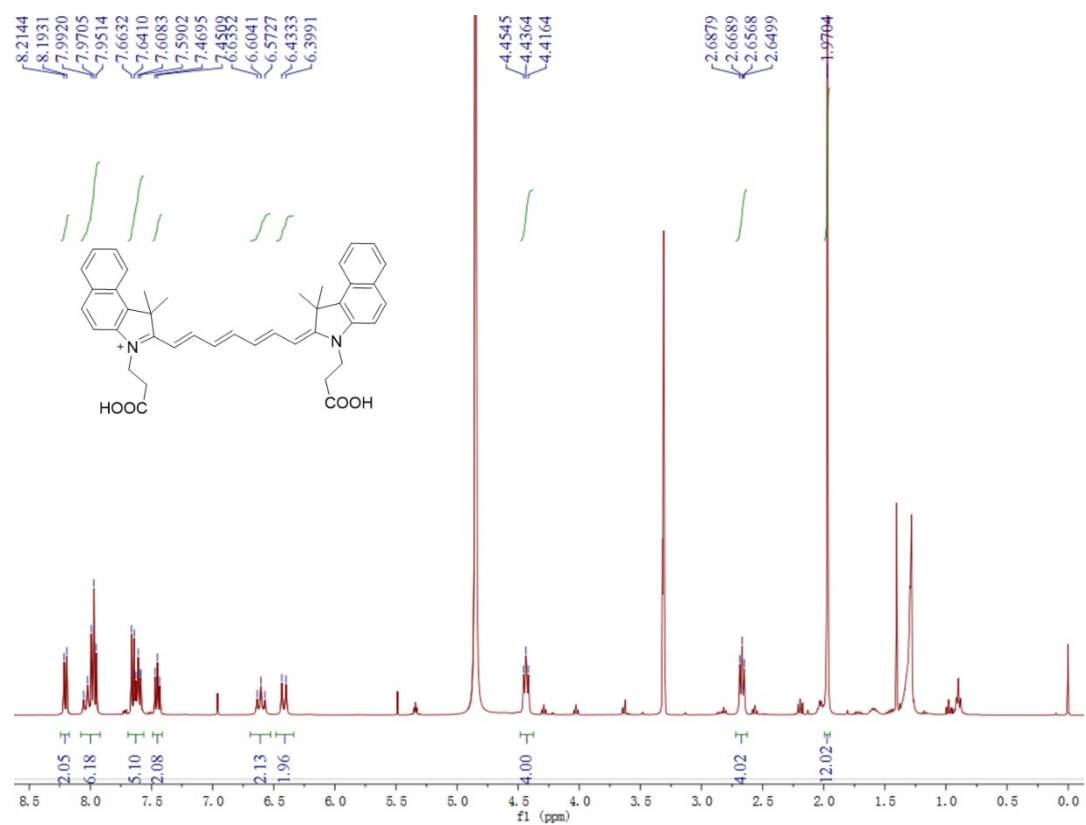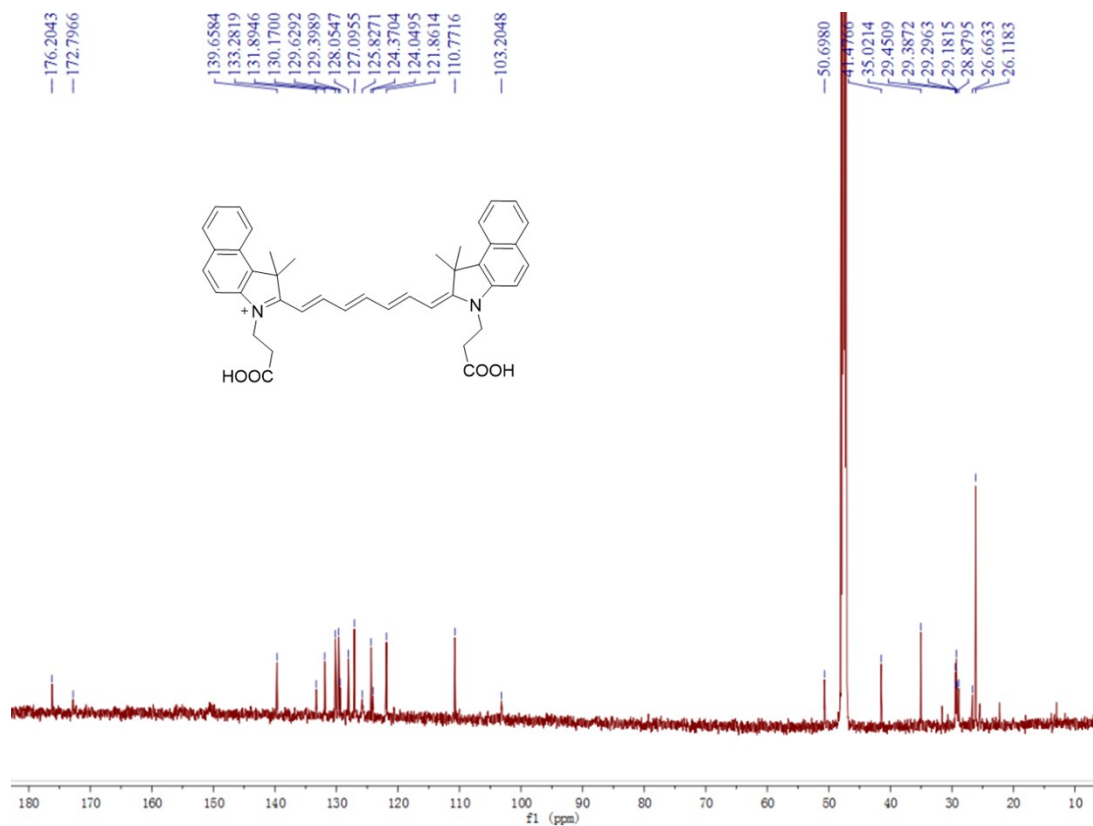

**Figure S1.** <sup>1</sup>H and <sup>13</sup>C NMR spectra of compound cypate.

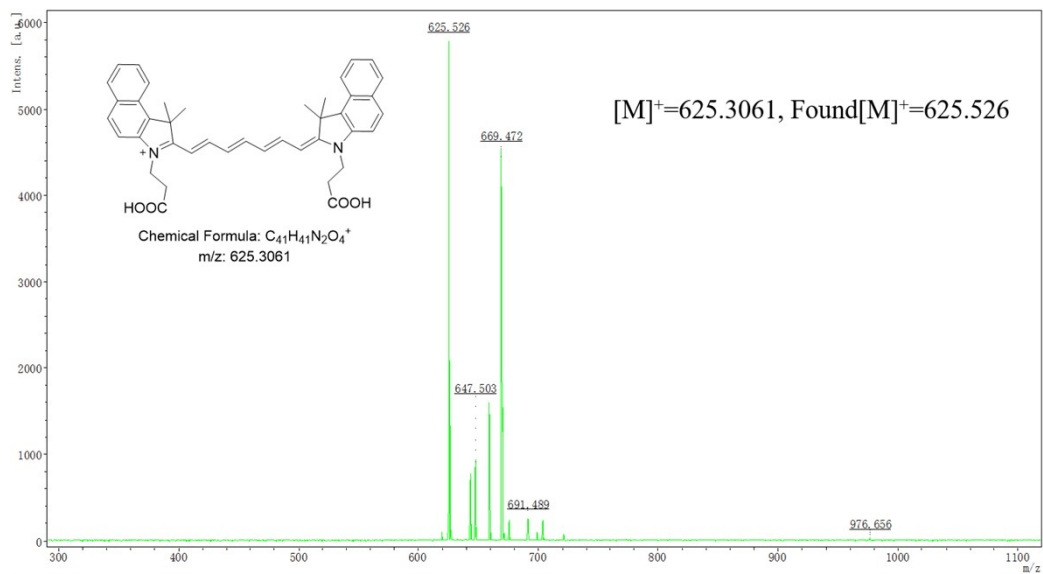

Figure S2. MALDI-TOF/MS spectrum of compound cypate.

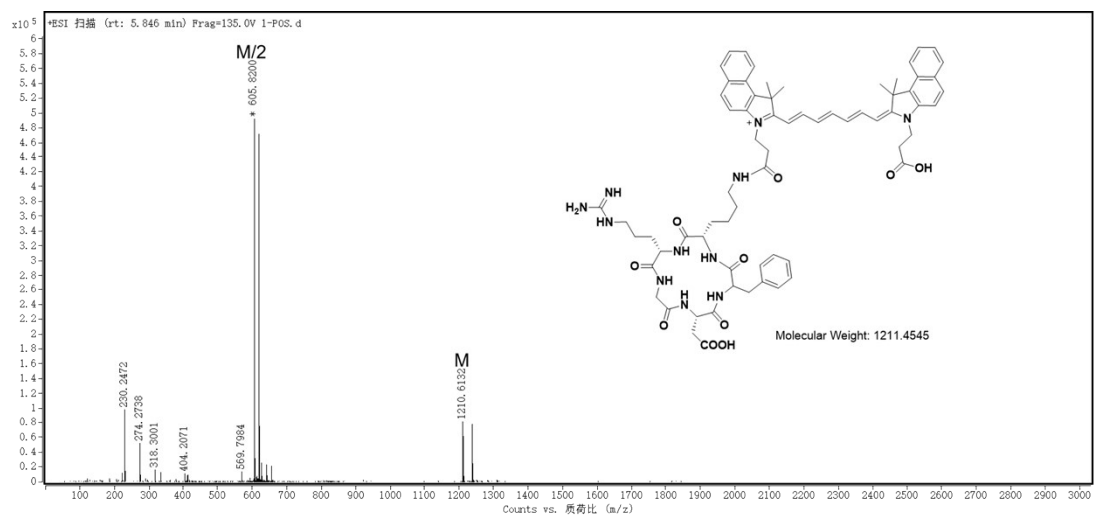

Figure S3. MALDI-TOF/MS spectrum of compound Cy-RGD.

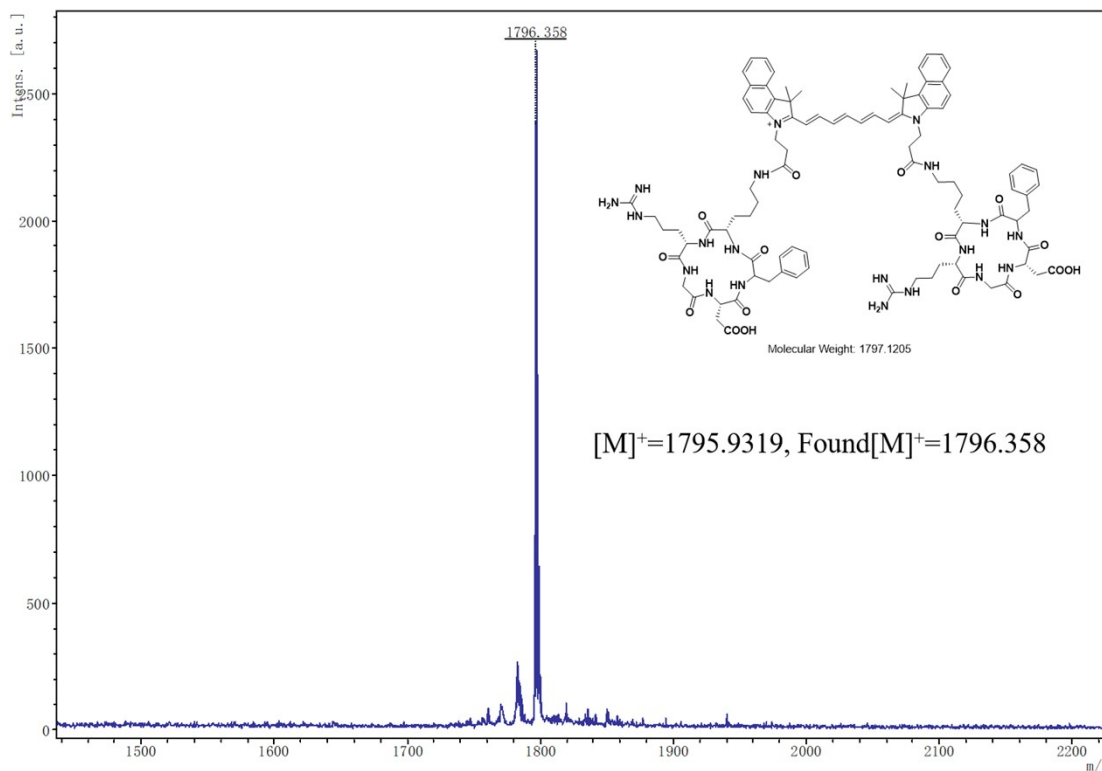

Figure S4. MALDI-TOF/MS spectrum of compound Cy-2RGD.

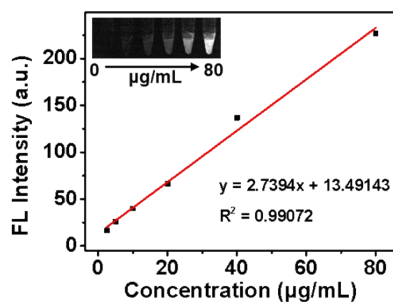

Figure S5. NIR fluorescence images of Cy-2RGD with different concentrations at 1000 nm.

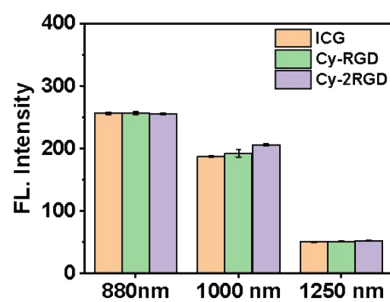

Figure S6. Quantitative fluorescence intensity of ICG, Cy-RGD, and Cy-2RGD with various long-pass filters in Fig.

1(d).

|                | Cy-RGD | Cy-2RGD |
|----------------|--------|---------|
| QY( $\theta$ ) | 2.0%   | 2.4%    |

**Table S1.** Quantum yields of Cy-RGD and Cy-2RGD in PBS buffer. ICG was chosen as the reference ( $\Phi = 2.5\%$ ). All the measurements were performed at room temperature.

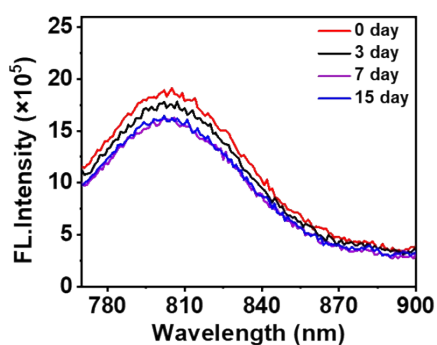

**Figure S7.** The stability of Cy-2RGD in PBS buffer at room temperature.

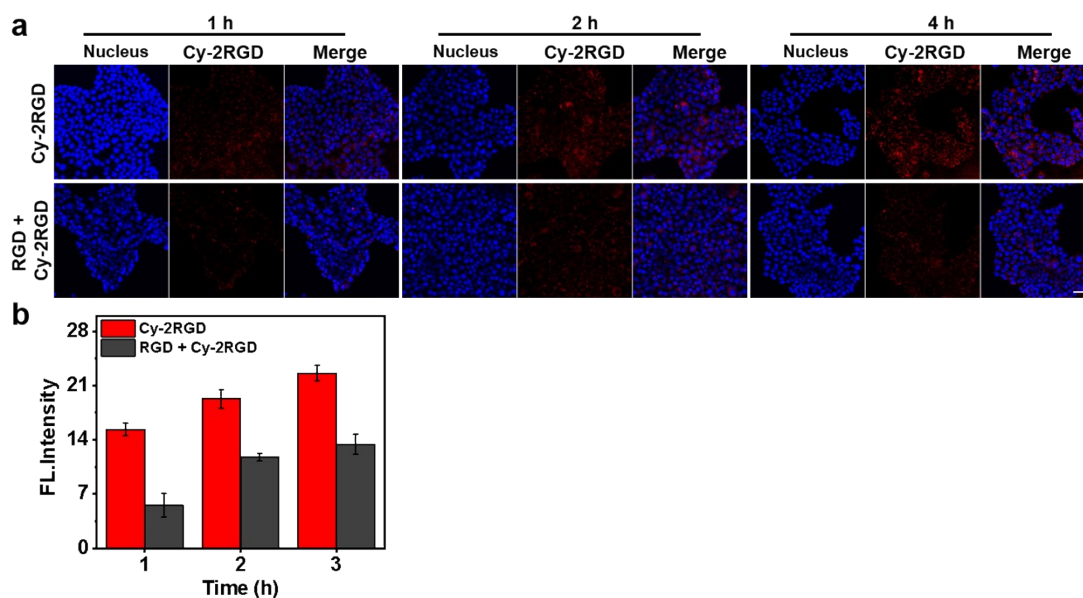

**Figure S8.** (a) Confocal fluorescence images of CAL-27 cells that were pretreated with or without RGD peptide ( $5 \mu\text{g mL}^{-1}$ , 4 h) for 4 h, then followed by incubating with Cy-2RGD ( $10 \mu\text{g mL}^{-1}$ ) for different time points (1 h, 2 h, and 4 h) at  $37^\circ\text{C}$ , (b) Quantitative fluorescence intensities of (a). Scale bar:  $40 \mu\text{m}$ .

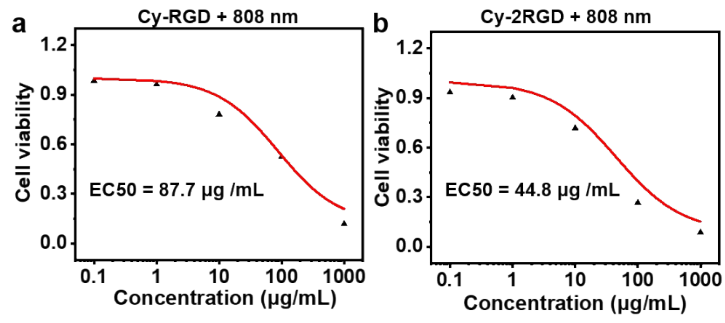

**Fig S9.** The fitted curve EC50 of Cy-RGD and Cy-2RGD under 808 nm laser irradiation.

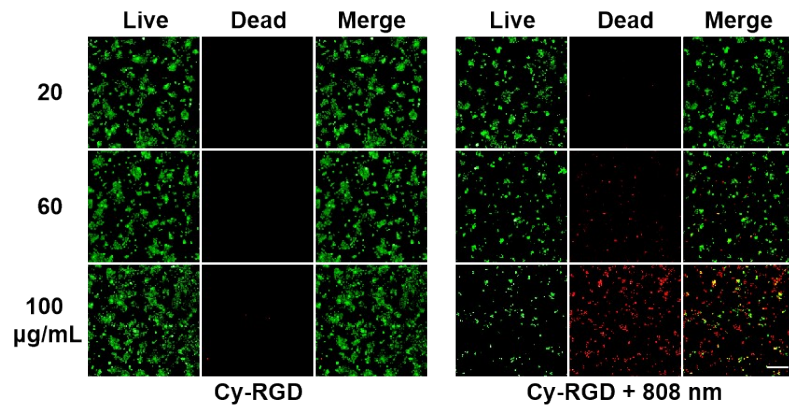

**Fig S10.** Live/dead fluorescence images of oral tumor cells treated with Cy-RGD for 24 h followed by 808 nm laser irradiation (1 W cm<sup>-2</sup>, 5 min) or not.

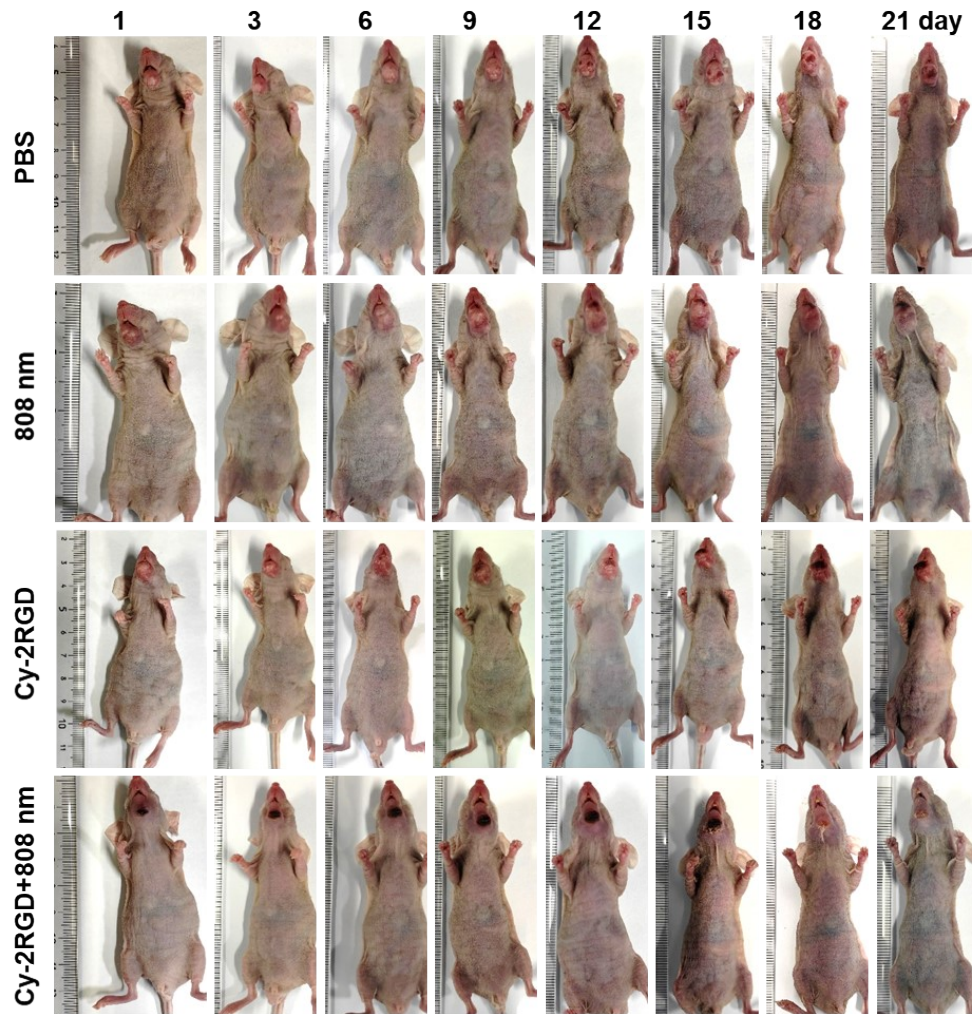

Figure S11. Images and representative mice captured on different days after each treatment.

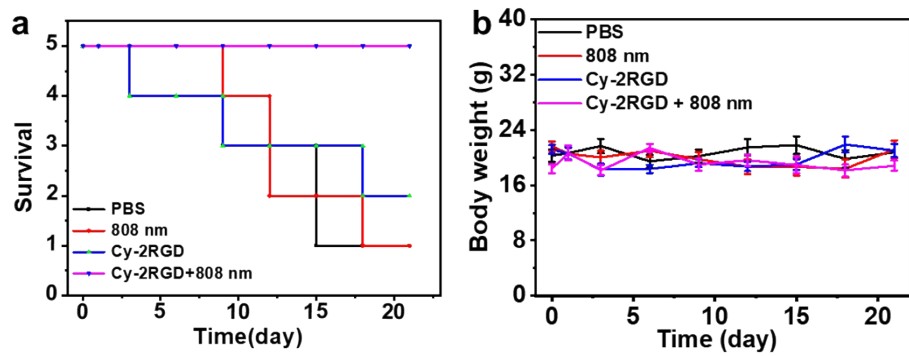

Figure S12. Survival curve (a) and body weight changes (b) of mice for each treatment group (n=5).



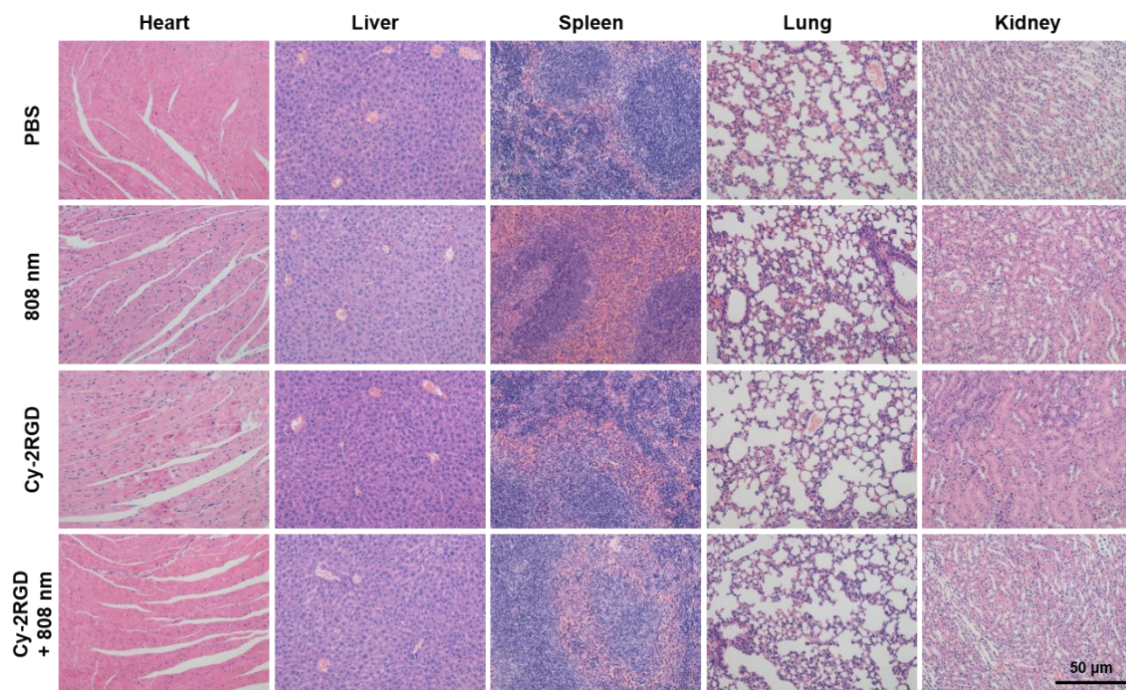

**Figure S13.** H&E staining graphs of major organs for representative mice with various treatments captured on 21 days. Scale bar: 50  $\mu$ m.

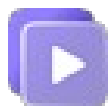

Supplementary video.mp4
